# Supplementary material for: Substrate Elasticity Exerts Functional Effects on Primary Microglia
Source: PubMed Central journal article supplement (PMC7674555; doi:10.3389/fncel.2020.590500), 2020-11-05
Supplement: Image_1.pdf [file Image_1.pdf]

# Suppl. Figure

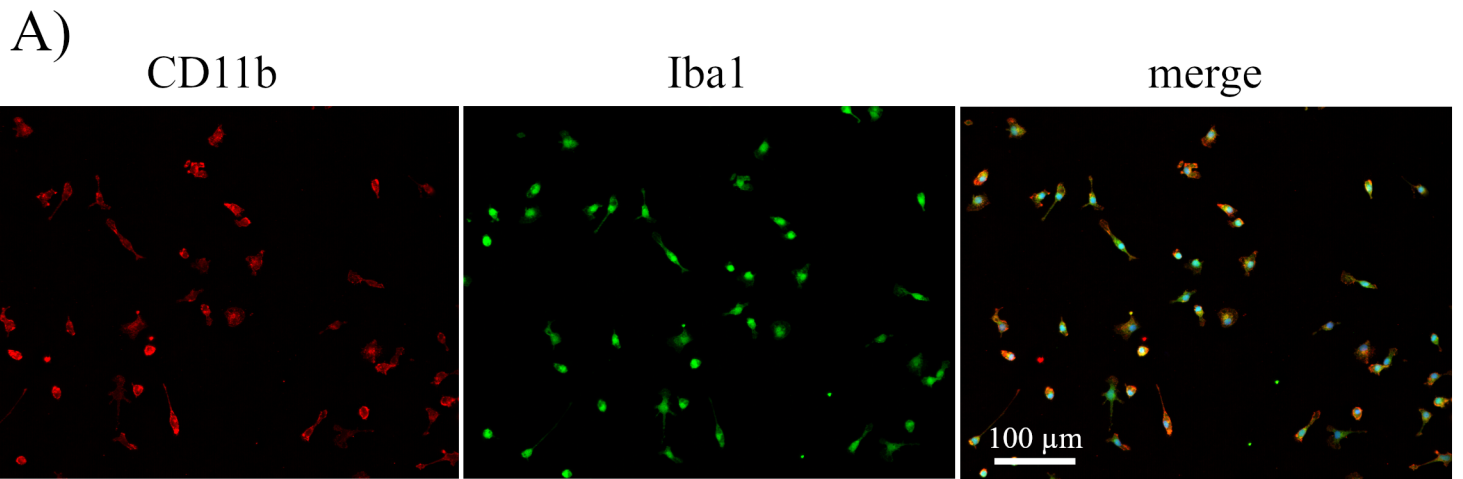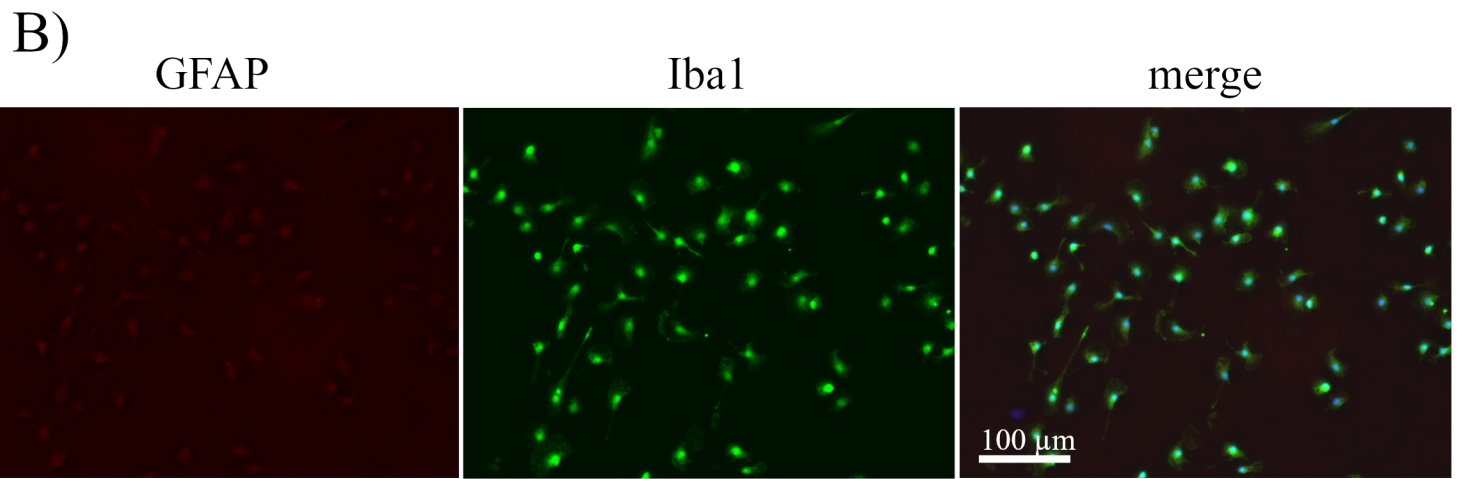

**Suppl. Figure:**

- (A) Representative images of microglia cultivated on soft PDMS substrates of 0.6 kPa expressing CD11b (red) as well as Iba1 (green) as characteristic microglia markers.
- (B) Cultivation on soft substrates of 0.6 kPa did not promote contamination with primary astrocytes as indicated by staining for GFAP (red), but exclusively yielded growth of primary Iba-1 positive (green) microglia.
